# Supplementary material
Source: ML conference proceedings conference paper supplement (https://openreview.net/forum?id=846X3N11bf)
Supplement: supplementary_material [file attachment]

**Our project page is at <https://probio-dataset.github.io>**
